# Supplementary material for: A null mutation in ANGPTL8 does not associate with either plasma glucose or type 2 diabetes in humans
Source: Springer Nature journal article supplement (doi:10.1186/s12902-016-0088-8), 2016-01-28
Supplement: MOESM1 [file 9754030]

**Supplementary Figure 1. *In-silico* predictions of the impact of premature termination codon p.Q121X suggests that the variant would trigger nonsense-mediated decay.** Transcript isoform ENST00000252453 is highly expressed in liver with some usage of ENST00000397785 which is a lowly expressed isoform. ENST00000252453 supports the p.Q121X annotation and results in nonsense mediated decay using RNA sequencing transcript isoform data publically available from the Genotype-Tissue Expression (GTEx) project (<http://www.gtexportal.org/>) and a predictive model implemented in MAMBA (<http://www.well.ox.ac.uk/~rivas/mamba>). Y-axis is Isoform expression value (RPKM).

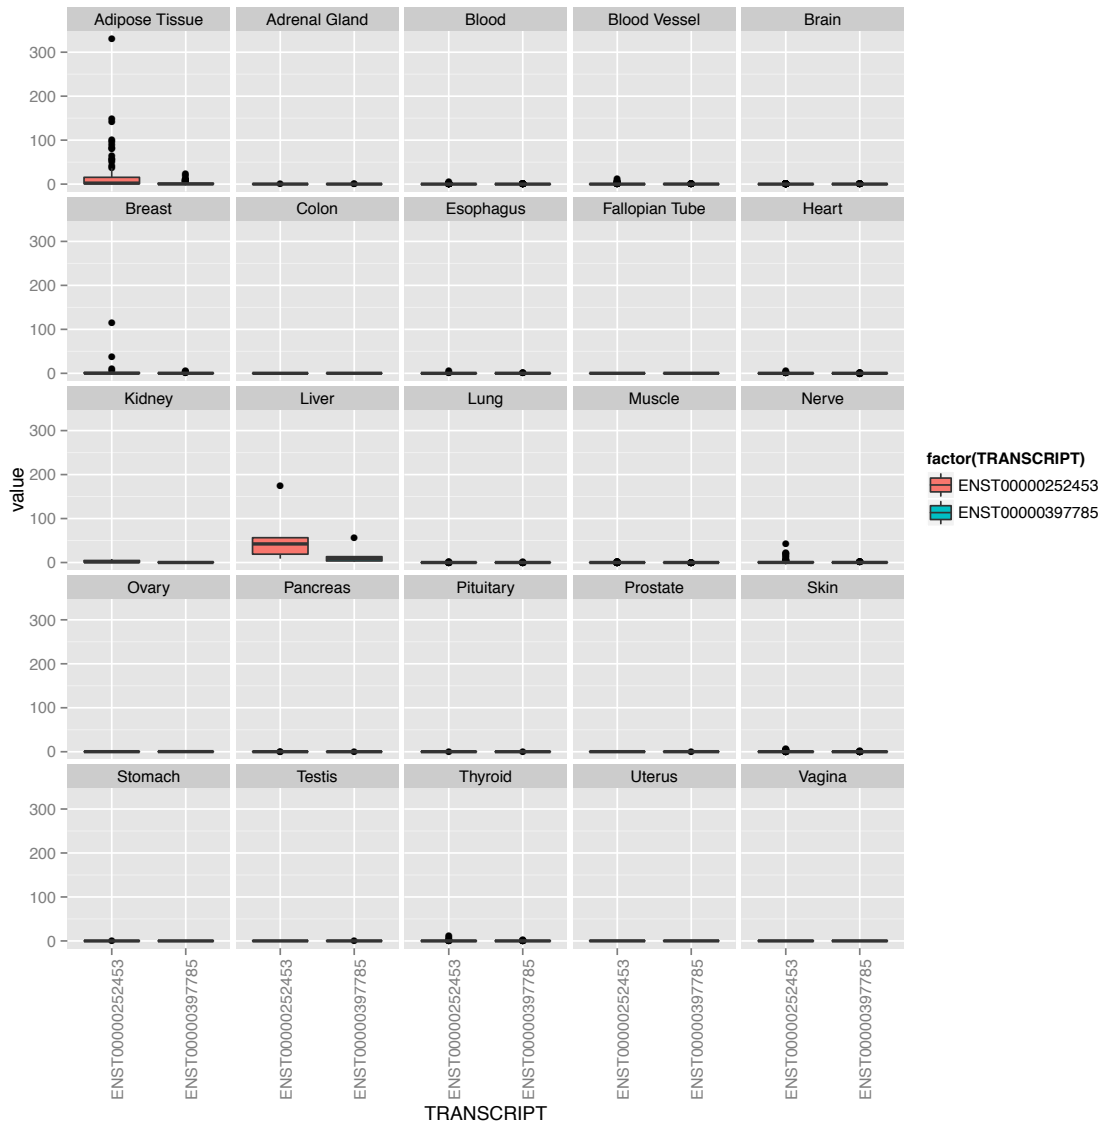

Supplementary Table 1. *ANGPTL8* p.Q121X and type 2 diabetes status by study

| Study     | p.Q121X carriers among cases | Percentage of cases who carry p.Q121X | p.Q121X carriers among controls | Percentage of controls who carry p.Q121X | Non-carriers among cases | Non-carriers among controls | Ref. |
|-----------|------------------------------|---------------------------------------|---------------------------------|------------------------------------------|--------------------------|-----------------------------|------|
| BioImage  | 1                            | 0.12%                                 | 10                              | 0.25%                                    | 814                      | 4,062                       | [1]  |
| CHARGE    | 15                           | 0.16%                                 | 95                              | 0.16%                                    | 9,509                    | 60,623                      | [2]  |
| T2D-GENES | 8                            | 0.18%                                 | 37                              | 0.23%                                    | 4,477                    | 15,907                      | [3]  |
| Summary   | 24                           | 0.16%                                 | 142                             | 0.18%                                    | 14,800                   | 80,592                      |      |

### References

1. Muntendam P, McCall C, Sanz J, Falk E, Fuster V: **The BioImage Study: novel approaches to risk assessment in the primary prevention of atherosclerotic cardiovascular disease--study design and objectives.** *Am Heart J* 2010, **160**(1):49-57 e41.
2. Wessel J, Chu AY, Willems SM, Wang S, Yaghootkar H, Brody JA, Dauriz M, Hivert MF, Raghavan S, Lipovich L *et al*: **Low-frequency and rare exome chip variants associate with fasting glucose and type 2 diabetes susceptibility.** *Nature communications* 2015, **6**:5897.
3. Flannick J, Thorleifsson G, Beer NL, Jacobs SB, Grarup N, Burtt NP, Mahajan A, Fuchsberger C, Atzmon G, Benediktsson R *et al*: **Loss-of-function mutations in SLC30A8 protect against type 2 diabetes.** *Nat Genet* 2014, **46**(4):357-363.
